# Supplementary material for: Multi-shelled hollow layered double hydroxides with enhanced performance for the oxygen evolution reaction
Source: Royal Society of Chemistry journal article supplement (doi:10.1039/d0cc07643k), 2021-01-01
Supplement: d0cc07643k1.pdf [file d0cc07643k1.pdf]

## Supporting Information

### **Multi-shelled hollow layered double hydroxides with enhanced performance for oxygen evolution reaction**

Yongji Qin,<sup>\*a</sup> Bingqing Wang,<sup>b</sup> Yuan Qiu,<sup>a</sup> Xijun Liu,<sup>a</sup> Gaocan Qi,<sup>c</sup> Shusheng

Zhang,<sup>d</sup> Aijuan Han,<sup>\*b</sup> Jun Luo<sup>a</sup> and Junfeng Liu<sup>b</sup>

*a. Institute for New Energy Materials & Low-Carbon Technologies and Tianjin Key Lab for*

*Photoelectric Materials & Devices, School of Materials Science and Engineering, Tianjin*

*University of Technology, Tianjin 300384, China. E-mail: 383151026@qq.com (Y. Qin).*

*b. State Key Laboratory of Chemical Resource Engineering, Beijing University of Chemical*

*Technology, Beijing 100029, China. E-mail: hanaijuan@mail.buct.edu.cn (A. Han).*

*c. Tianjin Key Lab for Photoelectric Materials & Devices, School of Materials Science and*

*Engineering, Tianjin University of Technology, Tianjin 300384, China.*

*d. College of Chemistry, Zhengzhou University, Zhengzhou 450000, China*

## Experimental Section

**1.1 Chemicals:** Commercial chemicals were bought from Sigma-Aldrich (ACS grade) and used as received except otherwise noted.

**1.2 Synthesis of multi-layered (ZIF-67@ZIF-8)<sub>n</sub>:** In a typical procedure, to prepare the ZIF-67 crystal, 5 mL of 2 M cobalt nitrate hexahydrate and 100 mL of 4 M 2-methylimidazole (2-MIM) in methanol solution were firstly prepared by mixing under magnetic stirring for 1 hour, and then left undisturbed for 24 h. The purple precipitate was centrifuged, washed with solvent three times and re-dispersed in 30 mL of methanol (suspension I).

To prepare ZIF-67@ZIF-8, suspension I was mixed with 30 mL of 0.27 M 2-MIM methanol solution and stirred for 10 min. Then, 5 mL of 0.4 M zinc nitrate hexahydrate methanol solution was added. After another 10 minutes stirring, the mixture was left undisturbed for 1 h. The precipitate was centrifuged, washed with solvent three times. Finally, the products were re-dispersed in 30 mL of methanol (suspension II).

To prepare (ZIF-67@ZIF-8)<sub>2</sub>, at first, 20 mL of suspension II was mixed with 30 mL of 0.27 M 2-MIM methanol solution and stirred for 10 min. Then, 5 mL of 0.4 M cobalt nitrate hexahydrate methanol solution was added. After another 10 minutes stirring, the mixture was left undisturbed for 1 h. The precipitate was centrifuged, washed with solvent three times and re-dispersed in 20 mL of methanol (suspension III). Then, the suspension III was mixed with 30 mL of 0.27 M 2-MIM methanol solution and stirred for 10 min. Then, 5 mL of 0.4 M zinc nitrate hexahydrate methanol solution was added. After another 10 minutes stirring, the mixture was left undisturbed for 1 h. The precipitate was centrifuged, washed with solvent three times and re-dispersed in 20 mL of methanol (suspension IV).

To prepare (ZIF-67@ZIF-8)<sub>3</sub>, the procedure was similar to that of (ZIF-67@ZIF-8)<sub>2</sub>, except using 10 mL of suspension IV as the seed for repeat growth of ZIF-67 and ZIF-8. Finally, the products were dispersed in 10 mL of methanol for further use (suspension V).

**1.3 Synthesis of multi-shelled hollow LDHs (MSH-LDHs):** To prepare single-shelled hollow LDHs (SSH-LDH), typically, 5 mL of suspension II (ZIF-67@ZIF-8) was washed and redispersed in 5 mL ethanol. Then, the resultant solution was poured into a mixed solution (33 mL EtOH, 2 mL MeOH) containing 0.01 M Ni(NO<sub>3</sub>)<sub>2</sub>·6H<sub>2</sub>O and 0.001 M Fe(NO<sub>3</sub>)<sub>3</sub>·9H<sub>2</sub>O. The mixture was aged at room temperature for 1 h. After the purple color disappeared, a yellow product was centrifuged, washed with ethanol and dried in a vacuum oven at 70 °C.

The synthesis procedure of double-shelled hollow LDHs (DSH-LDH) and triple-shelled hollow LDHs (TSH-LDH) was similar to that of SSH-LDH, except 5 mL of suspension IV and V instead of suspension II were used as precursors, respectively. The concentration of Ni(NO<sub>3</sub>)<sub>2</sub>·6H<sub>2</sub>O and Fe(NO<sub>3</sub>)<sub>3</sub>·9H<sub>2</sub>O was doubled or tripled for synthesizing DSH-LDH and TSH-LDH, respectively,

compared to that was used for SSH-LDH.

**1.4 Characterization:** The morphologies and sizes of samples were characterized by a transmission electron microscope (TEM, Hitachi HT-7700) operated at 100 kV. The energy-dispersive X-ray spectroscopy (EDX) and elemental mapping connected to the high-resolution TEM was performed by a field emission electron microscope (JEM-2100F) operated at 200 kV. Powder X-ray diffraction (XRD) was tested on a Shimadzu XRD-6000 diffractometer with Cu K $\alpha$  radiation ( $\lambda=1.5418$  Å). The X-ray photoelectron spectroscopy (XPS) was accomplished on a Thermo ESCALAB 250Xi system with an Al K $\alpha$  X-ray source. The N<sub>2</sub> adsorption–desorption isotherms and surface areas were determined using an Quantachrome Autosorb-iQ surface area analyzer. The samples were degassed at 423 K for 12 h prior to analysis. The Brunauer Emmett Teller (BET) method was used to calculate the specific surface areas. The pore size distributions were calculated from the Barrett-Joyner-Halenda (BJH) desorption method.

**1.5 OER test:** A CHI 660D (Chenhua, Shanghai) workstation was used to test all the electrochemical measurements, using a typical three-electrode system at RT with carbon rod as counter electrode as well as Hg/HgO electrode as reference electrode. All the inks were made by mixing 5 mg samples with 50  $\mu$ L of 0.5% Nafion solution and 950  $\mu$ L ethanol. After 1 h sonication, the ink was dried onto the carbon paper to make a 1 mg cm<sup>-2</sup> loading. The OER results were obtained in 1 M KOH aqueous solution and then transformed to reversible hydrogen electrode (RHE) potentials with iR calibration. Electrochemical impedance spectroscopy (EIS) was performed at overpotential from 100000 to 10<sup>-1</sup> Hz with a 5 mV voltage range. The stability was tested at constant overpotentials for ~60 h.

## Figures

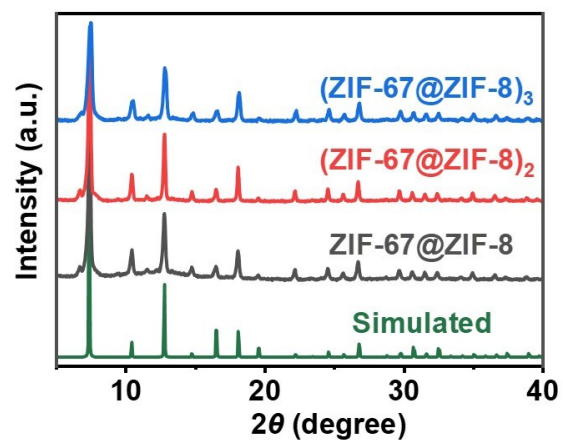

**Fig. S1** XRD patterns of ZIF-67@ZIF-8, (ZIF-67@ZIF-8)<sub>2</sub> and (ZIF-67@ZIF-8)<sub>3</sub>.

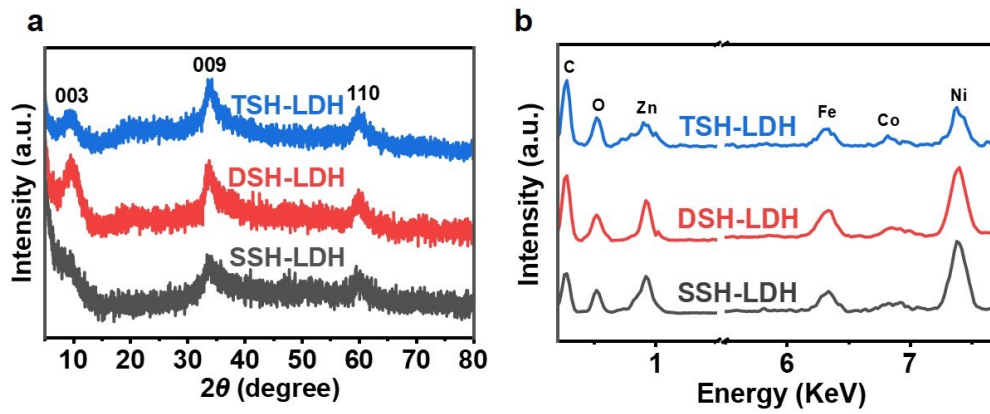

**Fig. S2** (a) XRD patterns and (b) EDX spectra of SSH-LDH, DSH-LDH, and TSH-LDH.

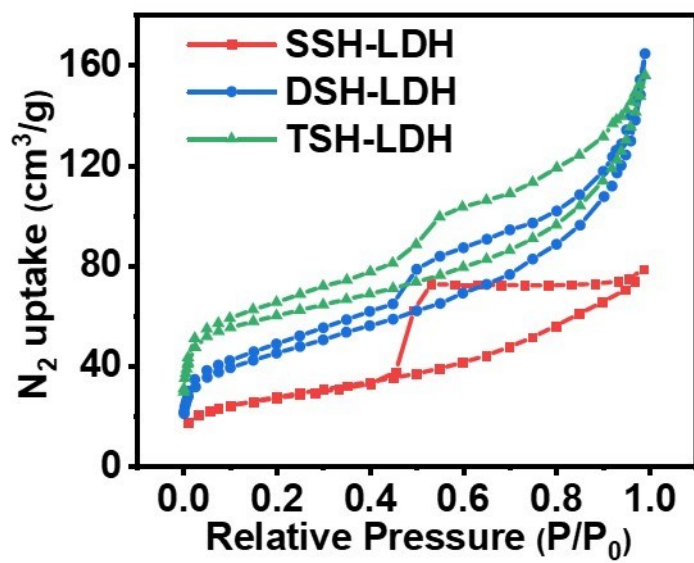

**Fig. S3** N<sub>2</sub> adsorption-desorption isotherms of SSH-LDH, DSH-LDH and TSH-LDH.

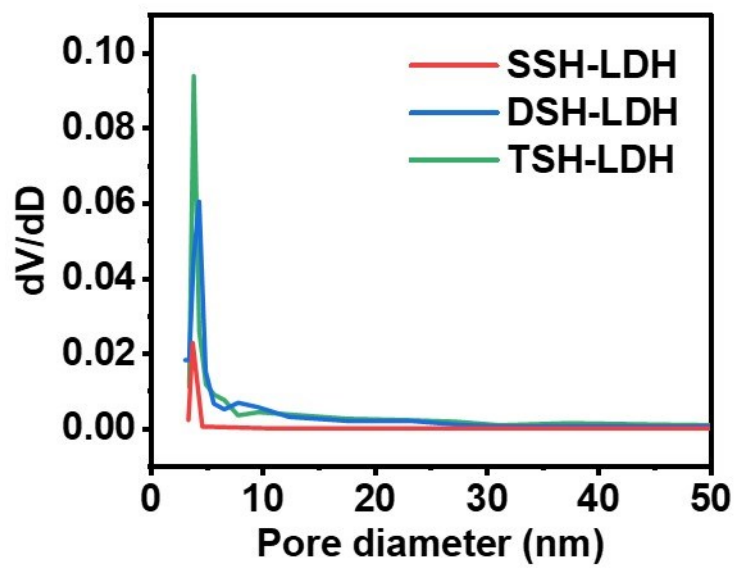

**Fig. S4** The BJH pore size distributions of SSH-LDH, DSH-LDH and TSH-LDH.

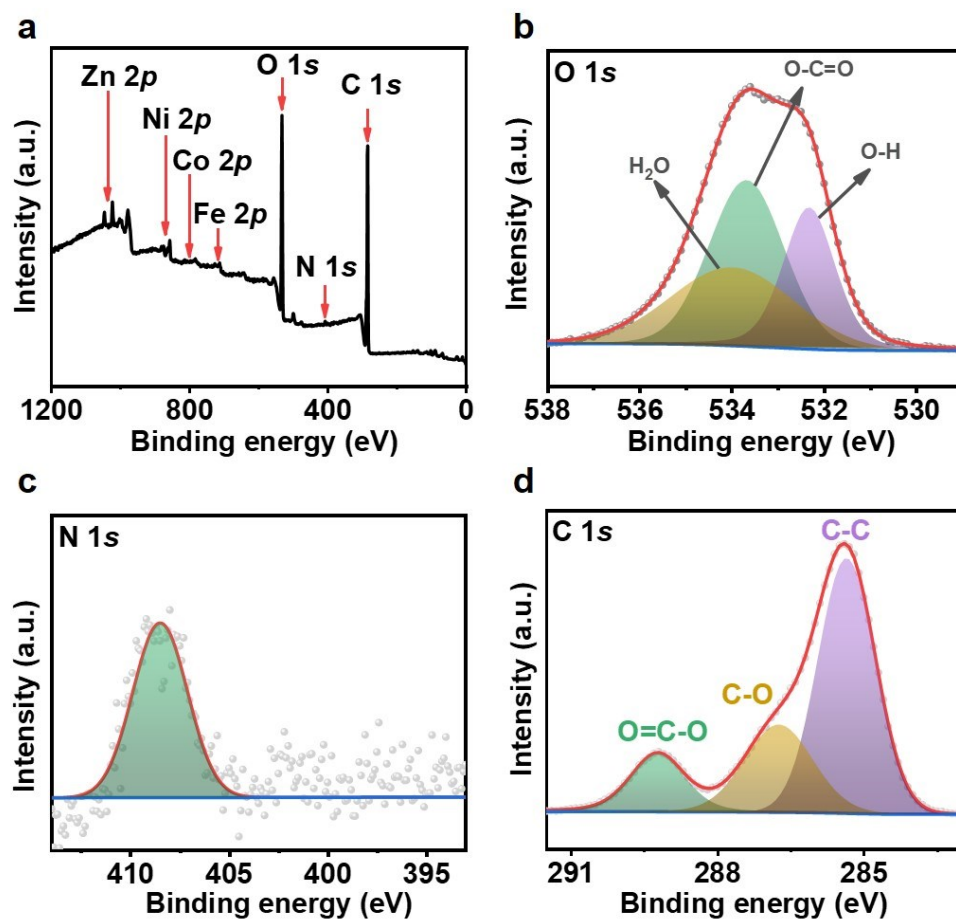

**Fig. S5** XPS spectra of (a) TSH-LDH; and its high-resolution XPS spectra of (b) O, (c) N, and (d) C.



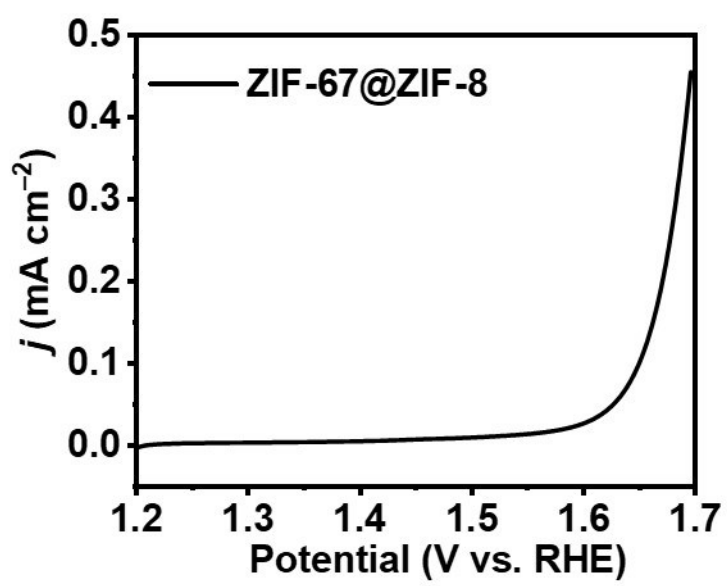

Fig. S6 Polarization curve of ZIF-67@ZIF-8.

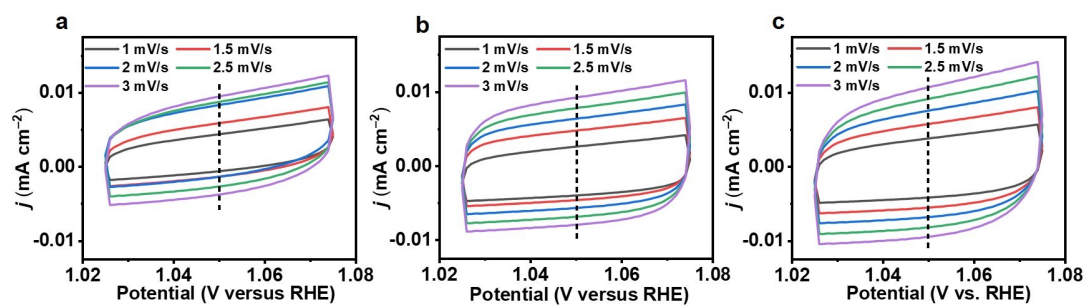

**Fig. S7** The CV curves of (a) SSH-LDH, (b) DSH-LDH and (c) TSH-LDH at different scan rates.

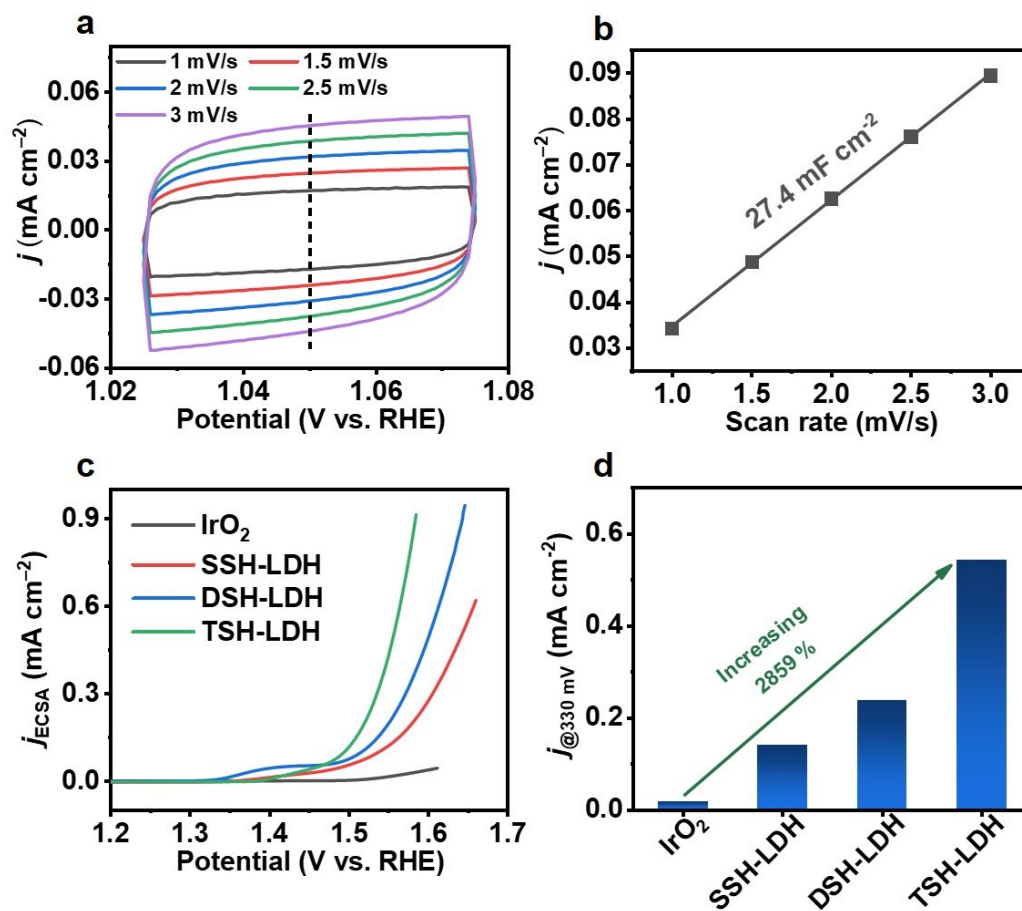

**Fig. S8** The (a) CV curves and (b)  $C_{\text{dl}}$  calculation of  $\text{IrO}_2$ . (c) LSV curves and (d) current densities when at  $\eta = 330$  mV after normalized by ECSA.

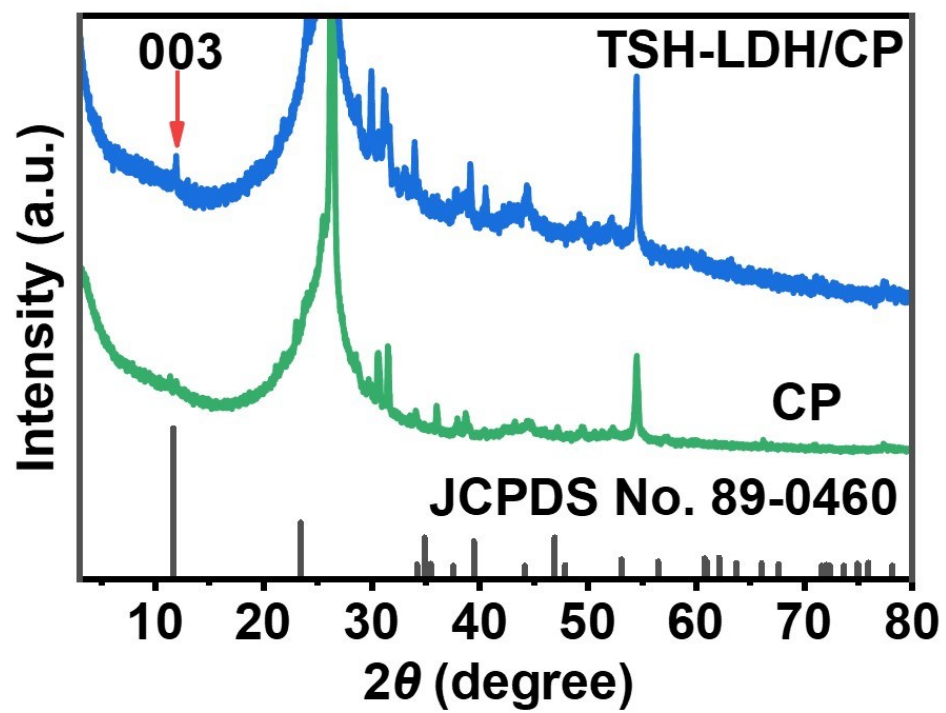

Fig. S9 XRD patterns of carbon paper (CP) and TSH-LDH/CP after the stability test.

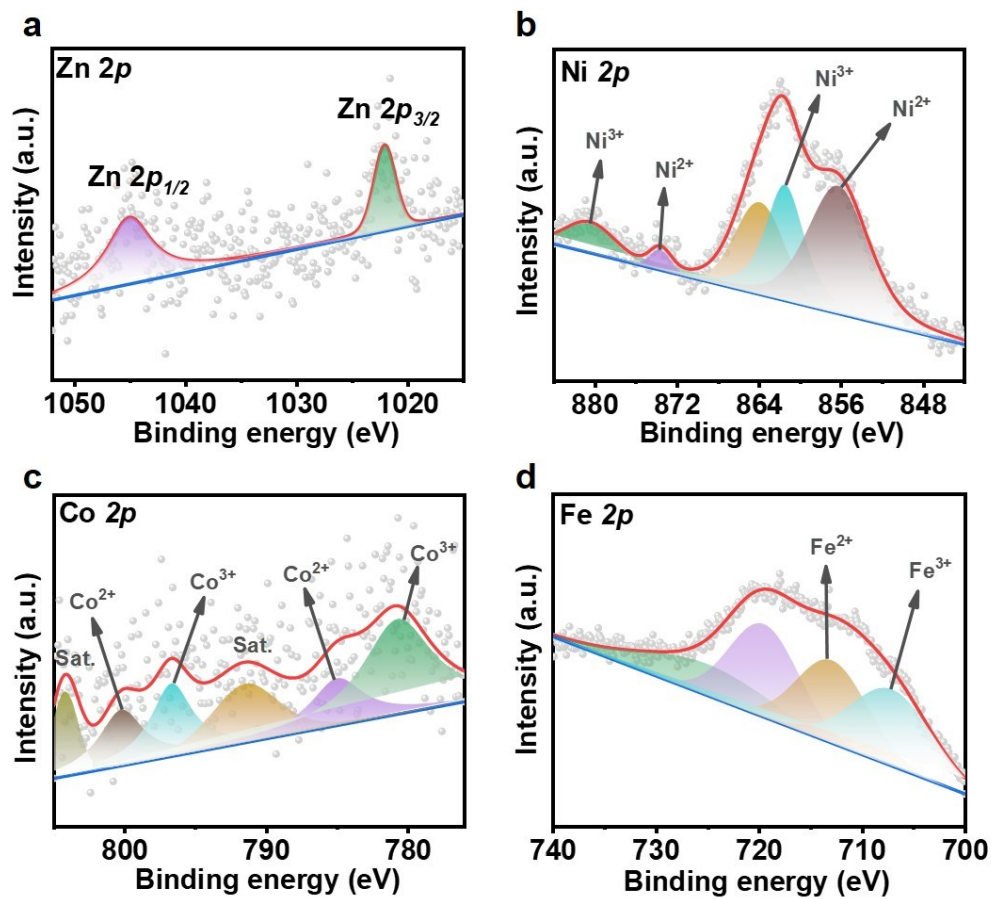

**Fig. S10** High resolution XPS spectra of Zn (a), Ni (b), Co (c), Fe (d) for the TSH-LDH after the stability test.

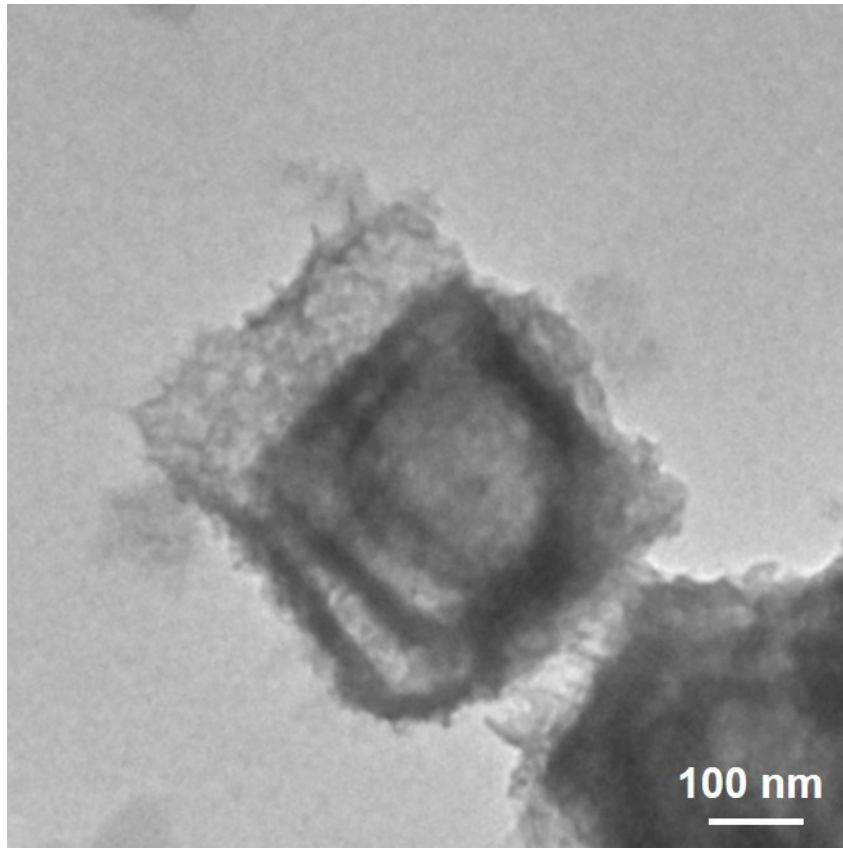

**Fig. S11** TEM image of TSH-LDH after the stability test.

**Table S1** The OER performance comparison of LDH related electrocatalysts.

| Sample                      | Synthetic temperature | Electrolyte | $\eta_{10 \text{ mA cm}^{-2}}$ (mV) | Tafel slope (mV dec <sup>-1</sup> ) | Stability (h) | ref                                  |
|-----------------------------|-----------------------|-------------|-------------------------------------|-------------------------------------|---------------|--------------------------------------|
| NiFe-LDH NP film            | 120 °C                | 0.1 M KOH   | 230                                 | 50                                  | 10            | Chem. Commun. 2014, 50, 6479         |
| NiFe-LDH                    | 100 °C                | 0.1 M KOH   | 270                                 | -                                   | -             | J. Am. Chem. Soc. 2015, 137, 15090.  |
| NiCo-LDH                    | 160 °C                | 1 M KOH     | 367                                 | 40                                  | 6             | Nano Lett. 2015, 15, 1421            |
| CoFe-OOH                    | Electro deposition    | 1 M KOH     | 300                                 | ~30                                 | 2             | J. Am. Chem. Soc. 2015, 137, 3638    |
| amorphous CoFe-H nanosheets | Electro deposition    | 1 M KOH     | 280                                 | 28                                  | ~40           | Adv. Funct. Mater. 2017, 27, 1603904 |
| NiFeV-LDH                   | 120 °C                | 1 M KOH     | 195 @ 20 mA cm <sup>-2</sup>        | 42                                  | 18            | Adv. Energy Mater. 2018, 8, 1703341. |
| NiFeCr-LDH                  | 120 °C                | 1 M KOH     | 225 @ 25 mA cm <sup>-2</sup>        | 69                                  | 6             | Adv. Energy Mater. 2018, 8, 1703189  |
| Fe-Ni LDH/MOF-b2            | 120 °C                | 1 M KOH     | 255                                 | 24                                  | 24            | Nanoscale, 2020, 12, 14514           |
| NiCoFe-LDH HP               | Room temperature      | 1 M KOH     | 276                                 | 56                                  | 12            | J. Energy Chem. 2020, 43, 104        |

|                    |                     |         |                              |      |       |                               |
|--------------------|---------------------|---------|------------------------------|------|-------|-------------------------------|
| Ni-Fe LDH<br>DSNCs | 100 °C              | 1 M KOH | 246 @ 20 mA cm <sup>-2</sup> | 71   | 50    | Adv. Mater. 2020, 32, 1906432 |
| MSH-LDH            | Room<br>temperature | 1 M KOH | 290                          | 86.5 | ~60 h | This work                     |

---
